# Supplementary material for: Further Evidence of Population Admixture in the Serbian Honey Bee Population
Source: Insects. 2022 Feb 9;13(2):180. doi: 10.3390/insects13020180 (PMC8879341; doi:10.3390/insects13020180)
Supplement: Supplementary file 1 [file insects-13-00180-s001.zip › Supplementary tables S1-S12.xlsx]

## Sheet: S1
Table S1. List of loci used in genetic analyses, primers used for their amplification, fluorescent dyes used for tagging the forward primers, annealing temperature (Tm) used in each reaction for the amplification of specific microsatellite loci with the combination of loci amplified together
in multiplex reactions I, II, III and IV.
Locus	Primer pairs	Label	Tm	Reference	Multiplex PCR
A7*	F: 5’ CCCTTCCTCTTTCATCTTCC 3’	FAM	58ºC	Solinac 2003	I
	R: 5’ GTTAGTGCCCTCCTCTTGC 3’
A8	F: 5’ CGAAGGTAAGGTAAATGGAAC 3’	FAM	55ºC	Solinac 2003	II
	R: 5’ GGCGGTTAAAGTTCTGG 3’
A14*	F: 5’ GTGTCGCAATCGACGTAACC 3’	FAM	58ºC	Estoup 1994	I
	R: 5’ GTCGATTACCGATCGTGACG 3'
A24*	F: 5’ CACAAGTTCCAACAATGC 3’	NED	55ºC	Solinac 2003	II
	R: 5’ CACATTGAGGATGAGCG 3’
A28*	F: 5’ GAAGAGCGTTGGTTGCAGG 3’	NED	55ºC	Solinac 2003	II
	R: 5’ GCCGTTCATGGTTACCACG 3’
A35*	F: 5’ GTACACGGTTGCACGGTTG 3’	PET	58ºC	Estoup 1994	I
	R: 5’ CTTCGATGGTCGTTGTACCC 3’
A43*	F: 5’ CACCGAAACAAGATGCAAG 3’	PET	55ºC	Solinac 2003	III
	R: 5’ CCGCTCATTAAGATATCCG 3’
A79	F: 5’ CGAAGGTTGCGGAGTCCTC 3’	VIC	58ºC	Solinac 2003	I
	R: 5’ GTCGTCGGACCGATGCG 3’
A88*	F: 5’ CGAATTAACCGATTTGTCG 3’	VIC	55ºC	Solinac 2003	III
	R: 5’ GATCGCAATTATTGAAGGAG 3’
A107*	F: 5’ CCGTGGGAGGTTTATTGTC 3'	FAM	60ºC	Estoup 1994	IV
	R: 5’ CCTTCGTAACGGATGACACC 3'
A113*	F: 5’ CTCGAATCGTGGCGTCC 3’	PET	60ºC	Solinac 2003	IV
	R: 5’ CCTGTATTTTGCAACCTCGC 3’
Ap43	F: 5’ GGCGTGCACAGCTTATTCC 3’	NED	60ºC	Solinac 2003	IV
	R: 5’ CGAAGGTGGTTTCAGGCC 3’
Ap249	F: 5’ CGCGCGACGACGAAATGT 3’	NED	55ºC	Solinac 2003	III
	R: 5’ CAGTCCTTTGATTCGCGCTACC 3’
B124	F: 5’ GCAACAGGTCGGGTTAGAG 3’	FAM	55ºC	Solinac 2003	III
	R: 5’ CAGGATAGGGTAGGTAAGCAG 3’
Loci used for meta-analysis are marked with *
Solignac, M.; Vautrin, D.; Loiseau, A.; Mougel, F.; Baudry, E.; Estoup, A.; Garnery, L.; Haberl, M.; Cornuet, J.M. Five hundred and fifty microsatellite markers for the study of the honeybee (Apis mellifera L.) genome. Molecular Ecology Notes 2003, 3, 307-311, doi:https://doi.org/10.1046/j.1471-8286.2003.00436.x.
Estoup, A.; Solignac, M.; Cornuet, J.M. Precise assessment of the number of patrilines and of genetic relatedness in honeybee colonies. Proceedings of the Royal Society of London. Series B: Biological Sciences 1994, 258, 1-7, doi:doi:10.1098/rspb.1994.0133.

## Sheet: S2
Table S2. Parameters of genetic diversity calculated per locus per populations including Garza Williamson index, Hardy Weinberg equilibrium (1001000 steps done) - Serbian localities. Statisticaly significant p-values lower than 0.05 are in bold anditalic
N - number of gene copies, A - number of alleles, Ho - observed heterozigosity, He - expected heterozigosity, HW - p-value for Hardy Weinberg equilibrium, HW-B - bonferoni corrected p values for HW, Ar - allelic size range, G-W - Garza Williamson index
population	Leskovac											Population	Fruška Gora
	Locus#	N	A	Ho	He	HW	HW-B	Ar	G-W				Locus#	N	A	Ho	He	P-value	HW-B	Ar	G-W
A7	1	102	12	0.54902	0.60726	0.58277	1	15	0.75			A7	1	58	8	0.48276	0.50998	0.80566	1	11	0.66667
A8	2	102	8	0.64706	0.74238	0.19978	1	12	0.61538			A8	2	58	7	0.58621	0.71869	0.10537	0.84296	9	0.7
A14	3	102	7	0.54902	0.50553	0.14584	1	9	0.7			A14	3	58	6	0.41379	0.50817	0.01452	0.17424	9	0.6
A24	4	102	4	0.58824	0.57173	0.75594	1	6	0.57143			A24	4	58	3	0.48276	0.50756	1	1	5	0.5
A28	5	102	3	0.11765	0.1491	0.12142	1	3	0.75			A28	5	58	3	0.17241	0.16273	1	2	5	0.5
A35	6	102	9	0.39216	0.50029	0.00684	0.08208	12	0.69231			A35	6	58	8	0.24138	0.34301	0.06895	1	12	0.61538
A79	7	102	9	0.84314	0.83537	0.44803	1	14	0.6			A79	7	58	10	0.82759	0.81549	0.47254	1	10	0.90909
A43	8	100	6	0.38	0.46384	8e-05	0.00112	25	0.23077			A43	8	54	3	0.18519	0.34312	0.01266	0.16458	7	0.375
A88	9	102	5	0.56863	0.66414	0.12033	1	7	0.625			A88	9	58	4	0.44828	0.36782	0.71389	1	5	0.66667
A107	10	98	17	0.89796	0.91269	0.74651	1	19	0.85			A107	10	54	13	0.74074	0.91405	0.02764	0.30404	18	0.68421
A113	11	96	13	0.4375	0.44912	0.59732	1	16	0.76471			A113	11	58	6	0.31034	0.28554	1	1	10	0.54545
Ap43	12	100	13	0.54	0.63717	0.00497	0.06461	32	0.39394			Ap43	12	56	13	0.71429	0.79545	0.19936	1	22	0.56522
Ap249	13	102	6	0.52941	0.48981	1	1	7	0.75			Ap249	13	58	6	0.24138	0.6092	0	0	19	0.3
B124	14	102	14	0.82353	0.81285	0.65443	1	13	1			B124	14	50	9	0.68	0.74041	0.07761	0.69849	8	1
	Mean	101	9	0.56166	0.59581			13.571	0.66382				Mean	56.714	7.071	0.46622	0.54437			10.714	0.61626
	s.d.	1.881	4.206	0.20477	0.19621			7.793	0.18792				s.d.	2.431	3.362	0.21872	0.22786			5.384	0.18457
population	Vlasina											population	Subotica
	Locus#	N	A	Ho	He	HW	HW-B	Ar	G-W				Locus#	N	A	Ho	He	P-value	HW-B	Ar	G-W
A7	1	28	6	0.35714	0.43651	0.09714	0.9714	8	0.66667			A7	1	74	8	0.62162	0.67049	0.97876	1	10	0.72727
A8	2	28	7	0.78571	0.73016	0.81887	1	9	0.7			A8	2	74	7	0.7027	0.74047	0.83973	1	9	0.7
A14	3	28	4	0.35714	0.50529	0.09173	1	3	1			A14	3	72	4	0.30556	0.27465	1	1	8	0.44444
A24	4	28	3	0.42857	0.54762	0.40027	1	5	0.5			A24	4	74	4	0.51351	0.56979	0.11018	1	6	0.57143
A28	5	28	3	0.14286	0.14021	1	1	3	0.75			A28	5	74	4	0.13514	0.22547	0.01083	0.12996	4	0.8
A35	6	28	7	0.64286	0.68519	0.10694	0.96246	12	0.53846			A35	6	72	7	0.36111	0.44679	0.1365	1	14	0.46667
A79	7	28	9	0.85714	0.86508	0.43061	1	11	0.75			A79	7	74	9	0.75676	0.80711	0.8686	1	11	0.75
A43	8	28	4	0.14286	0.42857	0.00199	0.02587	9	0.4			A43	8	72	5	0.13889	0.38067	0	0	8	0.55556
A88	9	28	5	0.71429	0.60317	1	1	7	0.625			A88	9	74	5	0.56757	0.49352	0.79488	1	7	0.625
A107	10	28	11	0.92857	0.90741	0.81866	1	21	0.5			A107	10	74	17	0.94595	0.88338	0.42559	1	19	0.85
A113	11	28	4	0.21429	0.2672	0.22362	1	6	0.57143			A113	11	74	7	0.37838	0.3358	1	1	11	0.58333
Ap43	12	22	5	0.36364	0.7013	0.00117	0.01638	8	0.55556			Ap43	12	74	12	0.7027	0.74861	0.52885	1	21	0.54545
Ap249	13	28	4	0.5	0.58466	0.00861	0.10332	5	0.66667			Ap249	13	74	5	0.32432	0.4876	0.00042	0.00546	6	0.71429
B124	14	24	8	0.83333	0.84058	0.66553	1	11	0.66667			B124	14	74	7	0.62162	0.70863	0.3058	1	6	1
	Mean	27.286	5.714	0.51917	0.58878			8.429	0.63503				Mean	73.571	7.214	0.50542	0.55521			10	0.66667
	s.d.	1.858	2.4	0.27265	0.22285			4.603	0.14633				s.d.	0.852	3.599	0.23974	0.20867			4.977	0.15459
population	Tromeđa											Population	Deliblatska peščara
	Locus#	N	A	Ho	He	HW	HW-B	Ar	G-W				Locus#	N	A	Ho	He	P-value	HW-B	Ar	G-W
A7	1	30		0.2	0.30575	0.0812	0.812	3	1			A7	1	100	11	0.36	0.57778	0	0	18	0.57895
A8	2	30		0.86667	0.78161	0.62964	1	11	0.58333			A8	2	94	7	0.6383	0.61267	0.85201	1	9	0.7
A14	3	30		0.8	0.56552	0.26884	1	8	0.55556			A14	3	98	6	0.16327	0.24532	0.00867	0.07803	9	0.6
A24	4	30		0.6	0.48046	0.20895	1	5	0.5			A24	4	100	3	0.62	0.53798	0.43453	1	5	0.5
A28	5	30		0.06667	0.06667	1	1	2	0.66667			A28	5	98	3	0.08163	0.07995	1	1	3	0.75
A35	6	30		0.2	0.1908	1	1	2	1			A35	6	94	8	0.40426	0.59094	0.00939	0.07512	20	0.38095
A79	7	30		1	0.78851	0.01574	0.18888	11	0.66667			A79	7	98	9	0.85714	0.80875	0.92323	1	13	0.64286
A43	8	18		0.11111	0.62092	0.00298	0.03874	7	0.375			A43	8	76	8	0.28947	0.52105	4e-05	0.00048	18	0.42105
A88	9	30		0.4	0.51494	0.20902	1	21	0.22727			A88	9	100	6	0.58	0.5204	0.28942	1	8	0.66667
A107	10	30		0.93333	0.92184	0.74455	1	13	0.78571			A107	10	94	15	0.82979	0.9094	0.12402	0.86814	23	0.625
A113	11	30		0.4	0.36552	1	1	10	0.63636			A113	11	94	10	0.29787	0.42233	0.00398	0.0398	12	0.76923
Ap43	12	8		0	0.71429	0.02863	0.31493	2	1			Ap43	12	78	12	0.64103	0.78188	0.00136	0.01496	23	0.5
Ap249	13	30		0.2	0.48046	0.00183	0.02562	5	0.66667			Ap249	13	100	6	0.52	0.63192	0	0	8	0.66667
B124	14	30		0.8	0.75862	0.87702	1	11	0.58333			B124	14	97	11	0.85417	0.78651	0.20667	1	14	0.73333
	Mean	27.571		0.46984	0.53971			7.929	0.66047				Mean	94.357	8.214	0.50978	0.57335			13.071	0.60962
	s.d.	6.477	2.538	0.35393	0.24656			5.385	0.22871				s.d.	7.742	3.401	0.25161	0.22244			6.486	0.12071
population	Stara planina												Vršac
	Locus#	N	A	Ho	He	HW	HW-B	Ar	G-W				Locus#	N	A	Ho	He	P-value	HW-B	Ar	G-W
A7	1	48	9	0.29167	0.46543	0.0041	0.0533	11	0.75			A7	1	28	7	0.21429	0.49206	0.00145	0.0174	13	0.5
A8	2	50	6	0.68	0.66612	0.52631	1	8	0.66667			A8	2	32	6	0.6875	0.71371	0.94722	1	8	0.66667
A14	3	50	7	0.6	0.71755	0.04822	0.53042	11	0.58333			A14	3	32	3	0.25	0.3246	0.43564	1	2	1
A24	4	50	4	0.56	0.54612	1	1	6	0.57143			A24	4	32	3	0.5625	0.5746	1	1	5	0.5
A28	5	50	4	0.24	0.22286	1	1	5	0.66667			A28	5	32	3	0.3125	0.28024	1	1	3	0.75
A35	6	46	5	0.21739	0.28019	0.09164	0.9164	7	0.625			A35	6	32	5	0.125	0.53226	5e-05	0.0007	11	0.41667
A79	7	50	7	0.92	0.80408	0.31698	1	6	1			A79	7	32	8	0.8125	0.82258	0.83616	1	9	0.8
A43	8	46	3	0.08696	0.52174	0	0	7	0.375			A43	8	30	4	0.13333	0.51264	0.00056	0.00728	14	0.26667
A88	9	50	5	0.72	0.63755	0.91849	1	7	0.625			A88	9	32	5	0.375	0.54435	0.1264	0.8848	6	0.71429
A107	10	46	17	0.82609	0.94976	0.20537	1	19	0.85			A107	10	32	13	0.6875	0.92742	0.01145	0.12595	14	0.86667
A113	11	50	6	0.28	0.26122	1	1	10	0.54545			A113	11	32	4	0.3125	0.28629	1	1	10	0.36364
Ap43	12	28	7	0.78571	0.75132	0.77641	1	7	0.875			Ap43	12	32	7	0.5625	0.77218	0.03685	0.2948	8	0.77778
Ap249	13	50	4	0.32	0.45959	0.01125	0.135	5	0.66667			Ap249	13	32	5	0.3125	0.38306	0.02072	0.18648	5	0.83333
B124	14	50	11	0.88	0.81551	0.59754	1	12	0.84615			B124	14	32	8	0.6875	0.77823	0.01643	0.1643	11	0.66667
	Mean	47.429	6.786	0.52913	0.5785			8.643	0.68903				Mean	31.571	5.786	0.43108	0.56744			8.5	0.6516
	s.d.	5.84	3.641	0.28197	0.22405			3.754	0.16161				s.d.	1.158	2.723	0.2295	0.20892			3.917	0.21212

## Sheet: S3
Table S3. Population specific Fis indices for 10100 permutations (Serbian localities)
	Population	Fis	P(Rand Fis>=Obs Fis)
	Vrsac	0.19304	0.000198
	Fruška Gora	0.11288	0.001782
	Deliblatska peščara	0.05029	0.037327
	Subotica	0.05963	0.028713
	Stara Planina	0.02449	0.280099
	Tromeđa	-0.04101	0.787624
	Vlasina	0.03665	0.237525
	Leskovac	0.03346	0.093069

## Sheet: S4
Table S4. Tables of significant linkage disequilibrium (Serbian localities). Detected linkage disequlibrium is marked with pink colour
Leskovac																Fruška Gora
Locus	A7	A8	A14	A24	A28	A35	A79	A43	A88	A107	A113	Ap43	Ap249	B124		Locus	A7	A8	A14	A24	A28	A35	A79	A43	A88	A107	A113	Ap43	Ap249	B124
A7	*	-	-	-	-	-	-	-	-	-	+	-	-	+		A7	*	-	-	-	-	-	-	-	-	-	-	+	-	-
A8	-	*	-	+	-	-	-	-	+	-	-	+	-	-		A8	-	*	-	-	-	-	-	-	-	-	-	-	-	-
A14	-	-	*	-	-	-	-	-	-	-	-	-	-	+		A14	-	-	*	-	-	-	-	+	-	+	-	-	-	-
A24	-	+	-	*	-	-	-	-	+	-	-	-	-	+		A24	-	-	-	*	+	-	+	+	-	+	-	-	-	-
A28	-	-	-	-	*	-	+	-	-	-	-	+	-	-		A28	-	-	-	+	*	-	-	+	-	-	-	-	-	-
A35	-	-	-	-	-	*	-	-	-	+	-	-	-	-		A35	-	-	-	-	-	*	-	-	-	-	-	-	-	-
A79	-	-	-	-	+	-	*	-	-	-	-	-	-	-		A79	-	-	-	+	-	-	*	-	+	+	-	-	-	-
A43	-	-	-	-	-	-	-	*	-	-	-	-	-	-		A43	-	-	+	+	+	-	-	*	-	-	-	-	-	-
A88	-	+	-	+	-	-	-	-	*	-	-	+	-	+		A88	-	-	-	-	-	-	+	-	*	-	-	+	-	-
A107	-	-	-	-	-	+	-	-	-	*	-	+	-	+		A107	-	-	+	+	-	-	+	-	-	*	-	-	+	-
A113	+	-	-	-	-	-	-	-	-	-	*	-	+	-		A113	-	-	-	-	-	-	-	-	-	-	*	-	-	+
Ap43	-	+	-	-	+	-	-	-	+	+	-	*	-	+		Ap43	+	-	-	-	-	-	-	-	+	-	-	*	-	+
Ap249	-	-	-	-	-	-	-	-	-	-	+	-	*	+		Ap249	-	-	-	-	-	-	-	-	-	+	-	-	*	+
B124	+	-	+	+	-	-	-	-	+	+	-	+	+	*		B124	-	-	-	-	-	-	-	-	-	-	+	+	+	*
Vlasina																Subotica
Locus	A7	A8	A14	A24	A28	A35	A79	A43	A88	A107	A113	Ap43	Ap249	B124		Locus	A7	A8	A14	A24	A28	A35	A79	A43	A88	A107	A113	Ap43	Ap249	B124
A7	*	-	-	-	-	-	-	-	-	-	-	+	-	-		A7	*	-	+	-	-	-	+	-	-	-	-	-	-	-
A8	-	*	-	-	-	-	-	-	-	-	-	-	-	-		A8	-	*	-	-	-	-	-	-	-	-	-	-	-	-
A14	-	-	*	-	-	-	-	-	-	-	-	-	-	+		A14	+	-	*	-	-	-	-	-	-	-	-	-	-	-
A24	-	-	-	*	-	-	-	-	-	-	-	-	-	-		A24	-	-	-	*	-	+	-	-	-	-	-	-	-	-
A28	-	-	-	-	*	-	-	-	+	-	-	-	-	-		A28	-	-	-	-	*	+	-	-	-	-	-	-	-	-
A35	-	-	-	-	-	*	-	-	-	-	+	-	-	-		A35	-	-	-	+	+	*	+	-	-	-	-	+	-	-
A79	-	-	-	-	-	-	*	-	-	-	-	-	-	-		A79	+	-	-	-	-	+	*	-	-	-	-	-	-	-
A43	-	-	-	-	-	-	-	*	-	-	-	-	-	-		A43	-	-	-	-	-	-	-	*	-	-	-	-	-	+
A88	-	-	-	-	+	-	-	-	*	-	-	-	-	-		A88	-	-	-	-	-	-	-	-	*	-	-	-	-	-
A107	-	-	-	-	-	-	-	-	-	*	-	-	-	-		A107	-	-	-	-	-	-	-	-	-	*	-	-	-	-
A113	-	-	-	-	-	+	-	-	-	-	*	-	-	+		A113	-	-	-	-	-	-	-	-	-	-	*	-	+	-
Ap43	+	-	-	-	-	-	-	-	-	-	-	*	-	-		Ap43	-	-	-	-	-	+	-	-	-	-	-	*	-	-
Ap249	-	-	-	-	-	-	-	-	-	-	-	-	*	-		Ap249	-	-	-	-	-	-	-	-	-	-	+	-	*	+
B124	-	-	+	-	-	-	-	-	-	-	+	-	-	*		B124	-	-	-	-	-	-	-	+	-	-	-	-	+	*
Tromeđa																Deliblatska peščara
Locus	A7	A8	A14	A24	A28	A35	A79	A43	A88	A107	A113	Ap43	Ap249	B124		Locus	A7	A8	A14	A24	A28	A35	A79	A43	A88	A107	A113	Ap43	Ap249	B124
A7	*	-	-	+	-	-	-	+	-	+	-	-	-	-		A7	*	-	-	-	-	-	-	+	-	-	-	-	+	-
A8	-	*	-	-	-	-	-	-	-	-	-	-	-	-		A8	-	*	-	+	-	-	-	-	-	-	-	-	-	-
A14	-	-	*	+	-	+	+	-	-	-	-	-	+	+		A14	-	-	*	-	-	-	-	-	-	-	-	-	-	-
A24	+	-	+	*	-	-	+	-	-	+	-	-	-	-		A24	-	+	-	*	-	-	+	-	+	-	-	-	+	+
A28	-	-	-	-	*	-	-	-	-	-	-	-	-	-		A28	-	-	-	-	*	-	-	-	-	-	-	-	-	-
A35	-	-	+	-	-	*	-	-	-	-	-	-	-	+		A35	-	-	-	-	-	*	-	-	-	-	-	+	+	-
A79	-	-	+	+	-	-	*	-	-	-	-	-	-	-		A79	-	-	-	+	-	-	*	-	-	-	-	+	-	-
A43	+	-	-	-	-	-	-	*	-	-	-	-	+	-		A43	+	-	-	-	-	-	-	*	-	-	-	+	-	-
A88	-	-	-	-	-	-	-	-	*	-	-	-	-	-		A88	-	-	-	+	-	-	-	-	*	-	-	-	-	-
A107	+	-	-	+	-	-	-	-	-	*	-	-	-	-		A107	-	-	-	-	-	-	-	-	-	*	-	-	-	-
A113	-	-	-	-	-	-	-	-	-	-	*	-	-	-		A113	-	-	-	-	-	-	-	-	-	-	*	-	-	+
Ap43	-	-	-	-	-	-	-	-	-	-	-	*	-	-		Ap43	-	-	-	-	-	+	+	+	-	-	-	*	-	-
Ap249	-	-	+	-	-	-	-	+	-	-	-	-	*	-		Ap249	+	-	-	+	-	+	-	-	-	-	-	-	*	+
B124	-	-	+	-	-	+	-	-	-	-	-	-	-	*		B124	-	-	-	+	-	-	-	-	-	-	+	-	+	*
Stara Planina																Vršac
Locus	A7	A8	A14	A24	A28	A35	A79	A43	A88	A107	A113	Ap43	Ap249	B124		Locus	A7	A8	A14	A24	A28	A35	A79	A43	A88	A107	A113	Ap43	Ap249	B124
A7	*	-	-	-	-	-	-	-	-	-	-	-	-	+		A7	*	-	-	-	-	-	-	+	-	+	-	-	-	-
A8	-	*	-	+	-	-	-	-	+	-	-	-	-	-		A8	-	*	-	-	-	-	-	-	-	-	-	-	-	-
A14	-	-	*	-	-	-	-	-	-	-	-	-	+	+		A14	-	-	*	-	-	-	-	-	-	-	+	-	-	-
A24	-	+	-	*	-	-	+	-	-	-	-	-	+	-		A24	-	-	-	*	-	-	-	-	-	-	-	-	-	+
A28	-	-	-	-	*	-	-	-	-	-	-	-	-	-		A28	-	-	-	-	*	-	+	-	-	-	-	-	-	-
A35	-	-	-	-	-	*	-	-	-	-	-	-	-	-		A35	-	-	-	-	-	*	-	-	-	-	-	-	-	-
A79	-	-	-	+	-	-	*	-	-	-	+	-	-	-		A79	-	-	-	-	+	-	*	-	-	-	-	-	-	-
A43	-	-	-	-	-	-	-	*	-	-	-	-	-	-		A43	+	-	-	-	-	-	-	*	-	-	-	+	-	-
A88	-	+	-	-	-	-	-	-	*	-	-	-	-	-		A88	-	-	-	-	-	-	-	-	*	-	-	-	-	-
A107	-	-	-	-	-	-	-	-	-	*	-	-	-	-		A107	+	-	-	-	-	-	-	-	-	*	-	-	+	-
A113	-	-	-	-	-	-	+	-	-	-	*	-	-	-		A113	-	-	+	-	-	-	-	-	-	-	*	-	-	-
Ap43	-	-	-	-	-	-	-	-	-	-	-	*	-	-		Ap43	-	-	-	-	-	-	-	+	-	-	-	*	-	-
Ap249	-	-	+	+	-	-	-	-	-	-	-	-	*	-		Ap249	-	-	-	-	-	-	-	-	-	+	-	-	*	-
B124	+	-	+	-	-	-	-	-	-	-	-	-	-	*		B124	-	-	-	+	-	-	-	-	-	-	-	-	-	*

## Sheet: S5
Table S5. Parameters of genetic diversity calculated per locus per populations including Garza Williamson index, Hardy Weinberg equilibrium (1001000 steps done) (all populations). Statisticaly significant p-values lower than 0.05 are in bold and italic
N - number of gene copies, A - number of alleles, Ho - observed heterozigosity, He - expected heterozigosity, HW - p-value for Hardy Weinberg equilibrium, HW-B - bonferoni corrected p values for HW, Ar - allelic size range, G-W - Garza Williamson index
Population	Hungary										Population	Hungary - Buckfast lineage										Population	Subotica
	Locus#	N	A	Ho	He	HW	HW-B	Ar	G-W			Locus#	N	A	Ho	He	HW	HW-B	Ar	G-W			Locus#	N	A	Ho	He	HW	HW-B	Ar	G-W
A7	1	474	15	0.99156	0.7597	0	0	34	0.42857		A7	1	20	4	1	0.62105	0.00047	0.00423	10	0.36364		A7	1	72	8	0.61111	0.67097	0.94634	1	10	0.72727
A14	2	472	17	0.95339	0.69251	0	0	58	0.28814		A14	2	20	5	1	0.77368	0.27826	1	13	0.35714		A14	2	72	4	0.30556	0.27465	1	1	8	0.44444
A24	3	468	9	0.99573	0.67359	0	0	9	0.9		A24	3	20	3	0.7	0.56842	0.54512	1	5	0.5		A24	3	72	4	0.5	0.5716	0.09468	0.75744	6	0.57143
A28	4	474	6	0.3038	0.28448	0.00916	0.00916	8	0.66667		A28	4	20	2	0.1	0.1	1	1	3	0.5		A28	4	72	3	0.13889	0.18192	0.27546	1	3	0.75
A35	5	472	8	0.99576	0.60412	0	0	10	0.72727		A35	5	20	4	0.9	0.68947	0.00276	0.01932	11	0.33333		A35	5	72	7	0.36111	0.44679	0.13251	0.92757	14	0.46667
A43	6	454	14	0.96476	0.69465	0	0	22	0.6087		A43	6	20	6	1	0.81579	0.00817	0.04902	9	0.6		A43	6	72	5	0.13889	0.38067	0	0	8	0.55556
A88	7	456	14	0.89035	0.67112	0	0	42	0.32558		A88	7	20	5	1	0.74737	0.58216	1	7	0.625		A88	7	72	5	0.58333	0.50196	0.70164	1	7	0.625
A107	8	468	24	0.99573	0.865	0	0	59	0.4		A107	8	18	5	0.88889	0.7451	0.00259	0.02072	4	1		A107	8	72	17	0.94444	0.8885	0.53194	1	19	0.85
A113	9	464	22	0.97414	0.67255	0	0	73	0.2973		A113	9	20	5	1	0.73684	0.57893	1	6	0.71429		A113	9	72	7	0.38889	0.3439	1	1	11	0.58333
	Mean	466.889	14.333	0.89613	0.65753			35	0.5158			Mean	19.778	4.333	0.84321	0.64419			7.556	0.55482			Mean	72	6.667	0.44136	0.47344			9.556	0.6193
	s.d.	7.491	6.103	0.22468	0.15763			24.49	0.21809			s.d.	0.667	1.225	0.29604	0.21797			3.395	0.21251			s.d.	0	4.213	0.254	0.21574			4.72	0.13394
Population	Spain										Population	Italy										Population	Deliblatska peščara
	Locus#	N	A	Ho	He	HW	HW-B	Ar	G-W			Locus#	N	A	Ho	He	HW	HW-B	Ar	G-W			Locus#	N	A	Ho	He	HW	HW-B	Ar	G-W
A7	1	20	5	1	0.71579	0.0365	0.2555	4	1		A7	1	30	7	1	0.77471	0.0003	0.0021	8	0.77778		A7	1	100	11	0.36	0.57778	0	0	18	0.57895
A14	2	18	6	0.66667	0.79739	0.04992	0.2496	10	0.54545		A14	2	30	7	1	0.67356	0.04822	0.09644	10	0.63636		A14	3	98	6	0.16327	0.24532	0.01024	0.0512	9	0.6
A24	3	18	4	0.11111	0.39869	0.00364	0.02912	11	0.33333		A24	3	30	4	1	0.67356	0.01403	0.05612	5	0.66667		A24	4	100	4	0.62	0.54848	0.54803	1	5	0.66667
A28	4	20	3	0.9	0.56316	0.04618	0.27708	3	0.75		A28	4	30	3	0.2	0.1908	1	1	5	0.5		A28	5	98	3	0.08163	0.07995	1	1	3	0.75
A35	5	20	9	1	0.90526	0.54412	0.54412	15	0.5625		A35	5	30	2	1	0.51724	0.00026	0.00208	1	1		A35	6	94	8	0.40426	0.59094	0.00964	0.05784	20	0.38095
A43	6	14	8	0.85714	0.91209	0.21757	0.65271	14	0.53333		A43	6	30	6	1	0.76322	8e-05	0.00072	9	0.6		A43	8	76	8	0.28947	0.52105	1e-05	8e-05	18	0.42105
A107	8	20	7	1	0.8	0.05965	0.2386	7	0.875		A88	7	30	4	1	0.62529	0.0015	0.009	5	0.66667		A88	9	100	6	0.58	0.5204	0.29905	0.89715	8	0.66667
A113	9	20	5	1	0.71053	0.25423	0.50846	11	0.41667		A107	8	28	11	1	0.83598	0.0307	0.0921	13	0.78571		A107	10	94	15	0.82979	0.9094	0.12674	0.50696	23	0.625
	Mean	18.75	5.875	0.81687	0.72536			9.375	0.62704		A113	9	30	4	1	0.65977	0.00252	0.0126	5	0.66667		A113	11	94	10	0.29787	0.42233	0.00036	0.00252	12	0.76923
	s.d.	2.121	2.031	0.30783	0.17375			4.373	0.22861			Mean	29.778	5.333	0.91111	0.6349			6.778	0.69998			Mean	94.8889	7.88889	0.402921	0.490628			12.8889	0.606502
												s.d.	0.667	2.739	0.26667	0.19079			3.563	0.14177			s.d.	7.55719	3.72305	0.236408	0.232294			7.11415	0.132628
Population	Poland - August forest										Population	Leskovac										Population	Vršac
	Locus#	N	A	Ho	He	HW	HW-B	Ar	G-W			Locus#	N	A	Ho	He	HW	HW-B	Ar	G-W			Locus#	N	A	Ho	He	HW	HW-B	Ar	G-W
A7	1	30	3	1	0.57701	0.00054	0.00432	2	1		A7	1	102	12	0.54902	0.60726	0.53722	1	15	0.75		A7	1	28	7	0.21429	0.49206	0.00142	0.00994	13	0.5
A14	2	30	13	1	0.90115	0.9927	0.9927	15	0.8125		A14	3	102	7	0.54902	0.50553	0.13737	0.13737	9	0.7		A14	3	32	3	0.25	0.3246	0.43642	1	2	1
A24	3	30	4	0.53333	0.5908	0.07743	0.30972	5	0.66667		A24	4	102	4	0.58824	0.57173	0.75121	1	6	0.57143		A24	4	32	3	0.5625	0.5746	1	1	5	0.5
A28	4	30	2	0.4	0.51494	0.60397	1	3	0.5		A28	5	102	4	0.15686	0.18482	0.14605	0.5842	3	1		A28	5	32	3	0.3125	0.28024	1	1	3	0.75
A35	5	30	7	1	0.85747	0.011	0.055	6	1		A35	6	102	9	0.39216	0.50029	0.00334	0.02672	12	0.69231		A35	6	32	5	0.125	0.53226	2e-05	0.00018	11	0.41667
A43	6	30	5	1	0.61149	2e-05	0.00018	8	0.55556		A43	8	100	6	0.38	0.46384	3e-05	9e-05	25	0.23077		A43	8	30	4	0.13333	0.51264	0.00068	0.00544	14	0.26667
A88	7	30	4	1	0.65057	0.00085	0.00595	6	0.57143		A88	9	102	5	0.56863	0.66414	0.11974	1	7	0.625		A88	9	32	5	0.375	0.54435	0.12134	0.6067	6	0.71429
A107	8	30	9	1	0.87126	0.00121	0.00726	9	0.9		A107	10	98	17	0.89796	0.91269	0.74877	1	19	0.85		A107	10	32	13	0.6875	0.92742	0.01024	0.06144	14	0.86667
A113	9	30	11	1	0.83678	0.11122	0.33366	15	0.6875		A113	11	96	13	0.4375	0.44912	0.60307	1	16	0.76471		A113	11	32	4	0.3125	0.28629	1	1	10	0.36364
	Mean	30	6.444	0.88148	0.71239			7.667	0.74374			Mean	100.667	8.55556	0.502154	0.539936			12.4444	0.687136			Mean	31.3333	5.22222	0.330291	0.497162			8.66667	0.597549
	s.d.	0	3.812	0.23753	0.15145			4.69	0.19174			s.d.	2.23607	4.55826	0.201033	0.194556			7.00198	0.212158			s.d.	1.41421	3.19287	0.188743	0.198791			4.74342	0.246781
Population	Poland - Krakow										Population	Vlasina
	Locus#	N	A	Ho	He	HW	HW-B	Ar	G-W			Locus#	N	A	Ho	He	HW	HW-B	Ar	G-W
A7	1	30	7	1	0.7908	0.0159	0.0795	7	0.875		A7	1	28	6	0.35714	0.43651	0.09491	0.66437	8	0.66667
A14	2	30	9	1	0.76322	0.03438	0.13752	9	0.9		A14	3	28	4	0.35714	0.50529	0.09436	0.75488	3	1
A24	3	30	5	0.8	0.73333	0.01061	0.06366	5	0.83333		A24	4	28	3	0.42857	0.54762	0.4016	1	5	0.5
A28	4	30	3	0.4	0.46667	0.37512	0.75024	3	0.75		A28	5	28	4	0.21429	0.20635	1	1	3	1
A35	5	30	4	1	0.58161	1e-05	8e-05	3	1		A35	6	28	7	0.64286	0.68519	0.1064	0.6384	12	0.53846
A43	6	28	5	1	0.6746	0	0	11	0.41667		A43	8	28	4	0.14286	0.42857	0.0022	0.0198	9	0.4
A88	7	30	6	0.93333	0.8	0.05103	0.15309	7	0.75		A88	9	28	5	0.71429	0.60317	1	1	7	0.625
A107	8	30	13	1	0.93793	0.00406	0.02842	15	0.8125		A107	10	28	11	0.92857	0.90741	0.80635	1	21	0.5
A113	9	30	10	1	0.86667	0.77588	0.77588	18	0.52632		A113	11	28	4	0.21429	0.2672	0.21994	1	6	0.57143
	Mean	29.778	6.889	0.9037	0.73498			8.667	0.76265			Mean	28	5.33333	0.444446	0.509701			8.22222	0.644618
	s.d.	0.667	3.219	0.20031	0.14398			5.196	0.18411			s.d.	0	2.44949	0.264328	0.2127			5.5852	0.215568
Population	Poland - Bialoweza										Population	Tromeđa
	Locus#	N	A	Ho	He	HW	HW-B	Ar	G-W			Locus#	N	A	Ho	He	HW	HW-B	Ar	G-W
A7	1	30	7	1	0.73793	0.00015	0.0012	6	1		A7	1	30	4	0.2	0.30575	0.0801	0.6408	3	1
A14	2	30	8	1	0.78391	0.00545	0.0327	10	0.72727		A14	3	30	5	0.8	0.56552	0.26505	1	8	0.55556
A24	3	30	5	0.8	0.71724	0.18036	0.36072	6	0.71429		A24	4	30	3	0.6	0.48046	0.20679	1	5	0.5
A28	4	30	4	0.26667	0.43448	0.12515	0.37545	14	0.26667		A28	5	30	2	0.06667	0.06667	1	1	2	0.66667
A35	5	30	8	0.93333	0.82989	0	0	13	0.57143		A35	6	30	3	0.2	0.1908	1	1	2	1
A43	6	30	7	1	0.78621	0.00601	0.03005	12	0.53846		A43	8	18	3	0.11111	0.62092	0.00279	0.02511	7	0.375
A88	7	30	6	0.46667	0.77471	0.02846	0.11384	7	0.75		A88	9	30	5	0.4	0.51494	0.20232	1	21	0.22727
A107	8	30	13	0.93333	0.90115	0.00365	0.02555	19	0.65		A107	10	30	11	0.93333	0.92184	0.74994	1	13	0.78571
A113	9	30	9	1	0.76092	0.29086	0.29086	18	0.47368		A113	11	30	7	0.4	0.36552	1	1	10	0.63636
	Mean	30	7.444	0.82222	0.74738			11.667	0.63242			Mean	28.6667	4.77778	0.412346	0.448047			7.88889	0.638508
	s.d.	0	2.603	0.2708	0.129			4.873	0.20508			s.d.	4	2.77389	0.307741	0.253075			6.17342	0.261829
Population	Poland - Wroclaw										Population	Stara planina
	Locus#	N	A	Ho	He	HW	HW-B	Ar	G-W			Locus#	N	A	Ho	He	HW	HW-B	Ar	G-W
A7	1	12	3	1	0.62121	0.09142	0.73136	2	1		A7	1	48	9	0.29167	0.46543	0.00296	0.02368	11	0.75
A14	2	12	6	1	0.84848	0.91688	1	10	0.54545		A14	3	50	7	0.6	0.71755	0.04879	0.34153	11	0.58333
A24	3	12	3	0.66667	0.66667	0.30794	1	5	0.5		A24	4	50	4	0.56	0.54612	1	1	6	0.57143
A28	4	12	2	0.5	0.5303	1	1	3	0.5		A28	5	50	4	0.24	0.22286	1	1	5	0.66667
A35	5	12	4	1	0.69697	0.01139	0.10251	4	0.8		A35	6	46	5	0.21739	0.28019	0.08457	0.50742	7	0.625
A43	6	12	5	1	0.84848	0.13439	0.94073	9	0.5		A43	8	46	3	0.08696	0.52174	0	0	7	0.375
A88	7	12	4	1	0.71212	0.47832	1	6	0.57143		A88	9	50	5	0.72	0.63755	0.92341	1	7	0.625
A107	8	10	4	1	0.77778	0.23762	1	3	1		A107	10	46	17	0.82609	0.94976	0.18697	0.93485	19	0.85
A113	9	12	3	1	0.68182	0.6532	1	5	0.5		A113	11	50	6	0.28	0.26122	1	1	10	0.54545
	Mean	11.778	3.778	0.90741	0.70932			5.222	0.65743			Mean	48.4444	6.66667	0.424679	0.51138			9.22222	0.62132
	s.d.	0.667	1.202	0.1884	0.10366			2.728	0.21625			s.d.	1.94365	4.272	0.256697	0.238039			4.26549	0.1329
Population	Poland - Siedlice										Population	Fruška Gora
	Locus#	N	A	Ho	He	HW	HW-B	Ar	G-W			Locus#	N	A	Ho	He	HW	HW-B	Ar	G-W
A7	1	30	6	1	0.82529	5e-05	0.00035	5	1		A7	1	58	8	0.48276	0.50998	0.82823	1	11	0.66667
A14	2	30	9	1	0.7954	0.29015	0.5803	15	0.5625		A14	3	58	6	0.41379	0.50817	0.01525	0.122	9	0.6
A24	3	30	4	0.93333	0.72414	0.1303	0.3909	5	0.66667		A24	4	58	3	0.48276	0.50756	1	1	5	0.5
A28	4	30	3	0.06667	0.53563	3e-05	0.00024	3	0.75		A28	5	58	3	0.17241	0.16273	1	1	5	0.5
A35	5	30	5	1	0.68736	0	0	4	1		A35	6	58	8	0.24138	0.34301	0.07377	0.44262	12	0.61538
A43	6	30	6	1	0.81379	0.00188	0.01128	9	0.6		A43	8	54	3	0.18519	0.34312	0.01281	0.11529	7	0.375
A88	7	30	6	1	0.8	0.00491	0.02455	7	0.75		A88	9	58	4	0.44828	0.36782	0.71636	1	5	0.66667
A107	8	26	6	1	0.76	0.04617	0.18468	7	0.75		A107	10	54	13	0.74074	0.91405	0.0282	0.1974	18	0.68421
A113	9	30	10	1	0.86667	0.32056	0.32056	13	0.71429		A113	11	58	6	0.31034	0.28554	1	1	10	0.54545
	Mean	29.556	6.111	0.88889	0.75648			7.556	0.75483			Mean	57.1111	6	0.386406	0.437998			9.11111	0.572598
	s.d.	1.333	2.205	0.30912	0.09886			4.096	0.15438			s.d.	1.76383	3.31662	0.1809	0.213171			4.28499	0.101895

## Sheet: S6
Table S6. Population specific Fis indices for 10100 permutations (all populations)
	Population	Fis	P(Rand Fis>=Obs Fis)
	Vrsac	0.27497	0
	Fruska Gora	0.06865	0.08495
	Deliblatska pescara	0.115	0.0004
	Subotica	0.01227	0.4097
	Stara Planina	0.05638	0.13535
	Tromedja	-0.05734	0.82327
	Vlasina	0.0751	0.13673
	Leskovac	0.04609	0.0798
	Hungary	-0.37741	1
	Wroclaw	-0.36808	0.99852
	Krakow	-0.20953	1
	Poland Aug forest	-0.2038	1
	Siedlice	-0.19124	0.9996
	Bialowieza	-0.08039	0.96941
	Spain	-0.21592	0.99881
	Italy	-0.49875	1
	Buckfast Hungary	-0.37002	1
	Name	Fis	P(Rand Fis>=Obs Fis)
	North Serbia	0.10209	0
	South Serbia	0.05173	0.01089
	Hungary	-0.37741	1
	Wroclaw	-0.36808	0.99762
	Krakow	-0.20953	1
	Poland Aug forest	-0.2038	1
	Siedlice	-0.19124	0.9998
	Bialowieza	-0.08039	0.96337
	Spain	-0.21592	0.99931
	Italy	-0.49875	1
	Buckfast Hungary	-0.37002	1

## Sheet: S7
Table S7. Tables of significant linkage disequilibrium (all populations). Detected linkage disequlibrium is marked with pink colour
Hungary											Hugary - Buckfast lineage											Subotica
Locus	A7	A14	A24	A28	A35	A43	A88	A107	A113		Locus	A7	A14	A24	A28	A35	A43	A88	A107	A113		Locus	A7	A14	A24	A28	A35	A43	A88	A107	A113
A7	*	+	+	+	+	+	+	+	+		A7	*	+	+	-	+	+	+	-	+		A7	*	+	-	-	-	-	-	-	-
A14	+	*	+	+	+	+	+	+	+		A14	+	*	+	+	-	+	-	-	+		A14	+	*	-	-	-	-	-	-	-
A24	+	+	*	+	+	+	+	+	+		A24	+	+	*	-	-	-	-	+	-		A24	-	-	*	-	+	-	-	-	-
A28	+	+	+	*	+	+	+	+	+		A28	-	+	-	*	-	-	-	-	-		A28	-	-	-	*	-	-	-	-	-
A35	+	+	+	+	*	+	+	+	+		A35	+	-	-	-	*	+	+	-	+		A35	-	-	+	-	*	-	-	-	-
A43	+	+	+	+	+	*	+	+	+		A43	+	+	-	-	+	*	-	-	+		A43	-	-	-	-	-	*	-	-	-
A88	+	+	+	+	+	+	*	+	+		A88	+	-	-	-	+	-	*	-	+		A88	-	-	-	-	-	-	*	-	-
A107	+	+	+	+	+	+	+	*	+		A107	-	-	+	-	-	-	-	*	+		A107	-	-	-	-	-	-	-	*	-
A113	+	+	+	+	+	+	+	+	*		A113	+	+	-	-	+	+	+	+	*		A113	-	-	-	-	-	-	-	-	*
Spain											Italy											Deliblatska peščara
Locus	A7	A14	A24	A28	A35	A43	A107	A113			Locus	A7	A14	A24	A28	A35	A43	A88	A107	A113		Locus	A7	A14	A24	A28	A35	A43	A88	A107	A113
A7	*	-	-	+	-	-	-	-			A7	*	+	+	-	+	-	+	-	-		A7	*	-	-	-	-	+	-	-	-
A14	-	*	+	-	-	-	-	-			A14	+	*	-	-	+	-	+	+	-		A14	-	*	-	-	-	-	-	-	-
A24	-	+	*	-	-	-	-	-			A24	+	-	*	-	+	-	+	-	+		A24	-	-	*	-	-	-	+	+	-
A28	+	-	-	*	-	-	+	+			A28	-	-	-	*	-	-	-	-	-		A28	-	-	-	*	-	-	-	-	-
A35	-	-	-	-	*	+	-	-			A35	+	+	+	-	*	+	+	-	+		A35	-	-	-	-	*	-	-	+	-
A43	-	-	-	-	+	*	-	-			A43	-	-	-	-	+	*	+	-	+		A43	+	-	-	-	-	*	-	-	-
A107	-	-	-	+	-	-	*	-			A88	+	+	+	-	+	+	*	-	+		A88	-	-	+	-	-	-	*	-	-
A113	-	-	-	+	-	-	-	*			A107	-	+	-	-	-	-	-	*	+		A107	-	-	+	-	+	-	-	*	-
											A113	-	-	+	-	+	+	+	+	*		A113	-	-	-	-	-	-	-	-	*
Poland - August forest											Leskovac											Vršac
Locus	A7	A14	A24	A28	A35	A43	A88	A107	A113		Locus	A7	A14	A24	A28	A35	A43	A88	A107	A113		Locus	A7	A14	A24	A28	A35	A43	A88	A107	A113
A7	*	+	-	+	+	+	+	-	-		A7	*	-	-	-	-	-	-	-	+		A7	*	-	-	-	-	+	-	+	-
A14	+	*	-	-	-	-	-	-	-		A14	-	*	-	-	-	-	-	-	-		A14	-	*	-	-	-	-	-	-	+
A24	-	-	*	-	-	-	-	-	-		A24	-	-	*	+	-	-	-	-	-		A24	-	-	*	+	-	-	-	-	-
A28	+	-	-	*	-	-	-	-	-		A28	-	-	+	*	-	-	-	-	-		A28	-	-	+	*	-	-	-	-	-
A35	+	-	-	-	*	-	-	-	-		A35	-	-	-	-	*	-	-	+	-		A35	-	-	-	-	*	-	-	-	-
A43	+	-	-	-	-	*	+	-	-		A43	-	-	-	-	-	*	-	-	-		A43	+	-	-	-	-	*	-	-	-
A88	+	-	-	-	-	+	*	+	+		A88	-	-	-	-	-	-	*	-	-		A88	-	-	-	-	-	-	*	-	-
A107	-	-	-	-	-	-	+	*	+		A107	-	-	-	-	+	-	-	*	-		A107	+	-	-	-	-	-	-	*	-
A113	-	-	-	-	-	-	+	+	*		A113	+	-	-	-	-	-	-	-	*		A113	-	+	-	-	-	-	-	-	*
Poland - Krakow											Vlasina
Locus	A7	A14	A24	A28	A35	A43	A88	A107	A113		Locus	A7	A14	A24	A28	A35	A43	A88	A107	A113
A7	*	-	-	-	+	-	-	-	-		A7	*	-	-	-	-	-	-	-	-
A14	-	*	-	-	+	-	-	-	-		A14	-	*	-	-	-	-	-	-	-
A24	-	-	*	-	+	-	-	-	-		A24	-	-	*	-	-	-	-	-	-
A28	-	-	-	*	-	-	+	-	-		A28	-	-	-	*	-	-	+	-	-
A35	+	+	+	-	*	+	+	-	+		A35	-	-	-	-	*	-	-	-	+
A43	-	-	-	-	+	*	+	-	+		A43	-	-	-	-	-	*	-	-	-
A88	-	-	-	+	+	+	*	+	+		A88	-	-	-	+	-	-	*	-	-
A107	-	-	-	-	-	-	+	*	-		A107	-	-	-	-	-	-	-	*	-
A113	-	-	-	-	+	+	+	-	*		A113	-	-	-	-	+	-	-	-	*
Poland - Bialoweza											Tromeđa
Locus	A7	A14	A24	A28	A35	A43	A88	A107	A113		Locus	A7	A14	A24	A28	A35	A43	A88	A107	A113
A7	*	-	-	-	-	-	-	+	-		A7	*	-	+	-	-	+	-	+	-
A14	-	*	-	-	-	-	-	+	-		A14	-	*	+	-	+	-	-	-	-
A24	-	-	*	-	-	-	-	-	-		A24	+	+	*	-	-	-	-	-	-
A28	-	-	-	*	-	-	-	-	-		A28	-	-	-	*	-	-	-	-	-
A35	-	-	-	-	*	-	-	-	-		A35	-	+	-	-	*	-	-	-	-
A43	-	-	-	-	-	*	-	-	-		A43	+	-	-	-	-	*	-	-	-
A88	-	-	-	-	-	-	*	-	-		A88	-	-	-	-	-	-	*	-	-
A107	+	+	-	-	-	-	-	*	+		A107	+	-	-	-	-	-	-	*	-
A113	-	-	-	-	-	-	-	+	*		A113	-	-	-	-	-	-	-	-	*
Poland - Wroclaw											Stara Planina
Locus	A7	A14	A24	A28	A35	A43	A88	A107	A113		Locus	A7	A14	A24	A28	A35	A43	A88	A107	A113
A7	*	-	-	+	+	-	+	+	-		A7	*	-	-	-	-	-	-	+	-
A14	-	*	-	-	-	-	-	-	+		A14	-	*	-	-	-	-	-	-	-
A24	-	-	*	-	-	+	-	+	-		A24	-	-	*	-	-	-	-	-	+
A28	+	-	-	*	+	-	-	+	-		A28	-	-	-	*	-	-	-	-	-
A35	+	-	-	+	*	-	-	+	+		A35	-	-	-	-	*	-	-	-	-
A43	-	-	+	-	-	*	+	+	-		A43	-	-	-	-	-	*	-	-	-
A88	+	-	-	-	-	+	*	-	-		A88	-	-	-	-	-	-	*	-	-
A107	+	-	+	+	+	+	-	*	-		A107	+	-	-	-	-	-	-	*	-
A113	-	+	-	-	+	-	-	-	*		A113	-	-	+	-	-	-	-	-	*
Poland - Siedlice											Fruška Gora
Locus	A7	A14	A24	A28	A35	A43	A88	A107	A113		Locus	A7	A14	A24	A28	A35	A43	A88	A107	A113
A7	*	+	-	-	-	+	-	-	-		A7	*	-	-	-	-	-	-	-	-
A14	+	*	-	-	-	+	-	-	-		A14	-	*	-	-	-	+	-	+	-
A24	-	-	*	-	-	+	-	-	-		A24	-	-	*	-	-	+	-	+	-
A28	-	-	-	*	-	-	-	-	+		A28	-	-	-	*	-	+	-	-	-
A35	-	-	-	-	*	+	+	+	+		A35	-	-	-	-	*	-	-	-	-
A43	+	+	+	-	+	*	-	+	-		A43	-	+	+	+	-	*	-	-	-
A88	-	-	-	-	+	-	*	+	-		A88	-	-	-	-	-	-	*	-	-
A107	-	-	-	-	+	+	+	*	+		A107	-	+	+	-	-	-	-	*	-
A113	-	-	-	+	+	-	-	+	*		A113	-	-	-	-	-	-	-	-	*

## Sheet: S8
Table S8. Pairwise population Fst (below diagonal) and Fst p values (above diagonal) between the populations based on the variability of 14 microsatellite loci found in 8 different localities of Apis mellifera carnica in Serbia. Significant p values (p ≤ 0.05) are colored in red and Fst values are bolded.
	Leskovac	Vlasina	Tromedja	Stara Planina	Fruska Gora	Subotica	Deliblatska Pescara	Vrsac
Leskovac	0	0.1682	0.00218	0.0101	0.0002	0.00446	0	0.01089
Vlasina	0.00493	0	0.0398	0.23225	0.16602	0.03911	0.17355	0.02237
Tromedja	0.02072	0.01853	0	0.12959	0.06455	0.00139	0.00257	0.00149
Stara Planina	0.0105	0.00424	0.00777	0	0.05396	0.00069	0.00079	0.00297
Fruska Gora	0.01728	0.00628	0.01134	0.0086	0	0.02148	0.00693	0.00188
Subotica	0.01021	0.0119	0.02567	0.01879	0.0099	0	0.00218	0.00436
Deliblatska Pescara	0.01857	0.00509	0.02396	0.02073	0.01229	0.01206	0	0.00149
Vrsac	0.01387	0.01906	0.03698	0.02501	0.02604	0.02	0.02279	0

## Sheet: S9
Table S9. Outcomes of AMOVA analysis based on the variability of 14 microsatelite loci when population sample from Serbia was grouped according to the geographical region: North vs South. p- values for apropriate source of variations are presented in brackets and values of p<0.05 are in bold.
Source of variation	d.f.	SS	Variance components	Percentage of variation
Among regions	1	8.967	0.011	0.32 (p=0.119)
Among localities within region	6	34.458	0.041	1.23 (p=0.000)
Among individuals within localities	229	797.685	0.184	5.48 (p=0.000)
Within individuals	237	738.5	3.116	92.97 (p=0.000)
Total	473	1579.61	3.352

## Sheet: S10
Table S10. Pairwise population Fst (below diagonal) and Fst p values (above diagonal) between the populations based on the variability of 9 microsatellite loci when Serbian localities were grouped according to their geographical region and other A. mellifera populations from: Hungary (A.m. carnica and Buckfast),
Poland (A.m.carnica and A.m.mellifera), Italy (A.m.ligustica) and Spain (A.m.iberica) . Significant p values (p ≤ 0.05) are colored in red and Fst values are bolded.
	North Serbia	South Serbia	Hungary	Spain	Italy	Hungary Buckfast	Poland (A. m. mellifera)	Poland (A. m. carnica)
North Serbia (A. m. carnica)	0	0	0	0	0	0	0	0
South Serbia (A. m. carnica)	0.01057	0	0	0	0	0	0	0
Hungary (A. m. carnica)	0.08219	0.07755	0	0	0	0	0	0
Spain (A. m. iberica)	0.45028	0.41318	0.30488	0	0	0	0	0
Italy (A. m. ligustica)	0.14386	0.12998	0.05434	0.31705	0	0.00287	0	0.0004
Hungary Buckfast	0.19041	0.16024	0.09353	0.29276	0.0762	0	0	0.00337
Poland (A. m. mellifera)	0.20552	0.18242	0.09575	0.11827	0.09512	0.07739	0	0.24859
Poland (A. m. carnica)	0.16605	0.14719	0.05595	0.15837	0.06194	0.05366	0.00266	0

[truncated: 2 more sheets: S11, S12]
